# Supplementary material for: Leveraging Delta Smelt Data for Juvenile Chinook Salmon Monitoring in the San Francisco Estuary
Source: Preprints.org preprint supplement (doi:10.20944/preprints202006.0362.v2), 2020-11-26
Supplement: Supplementary file 1 [file supplementary]

1 **Appendix A: Supplemental Figures and Tables**

2  
3 **Authors:** Brian Mahardja\*, Lara Mitchell, Michael Beakes, Catherine Johnston, Cory  
4 Graham, Pascale Goertler, Denise Barnard, Gonzalo Castillo, Bryan Matthias

5  
6 Corresponding author: bmahardja@usbr.gov

7  
8 Figure A1. Locations of strata (area enclosed by colored lines) and sites (points)  
9 sampled in the San Francisco Estuary by EDSM during Phase 1 (December through  
10 March) of (a) 2016–2017 and (b) 2017–2018. For Phase 1 of 2017-2018 (b), Western  
11 Delta, Southern Delta, Eastern Delta, and Upper Sacramento are considered low  
12 density strata while other strata are considered high density.

13

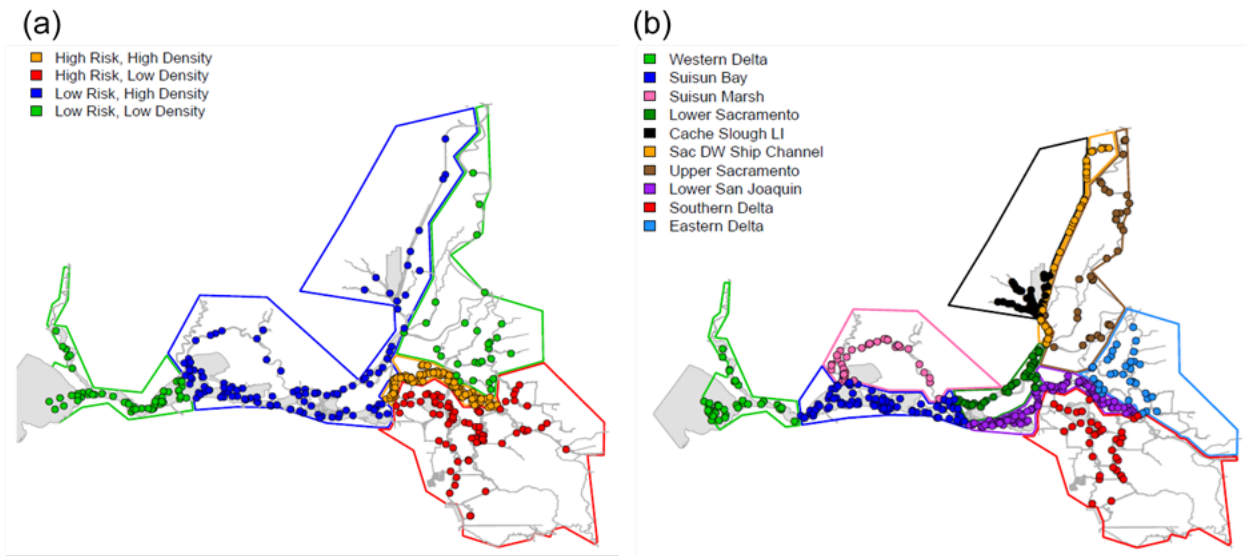

14  
15  
16  
17  
18  
19  
20  
21  
22  
23  
24  
25  
26  
27  
28  
29  
30  
31  
32

33 Figure A2. Series of bean plots depicting the size distribution of juvenile Chinook  
 34 Salmon caught by gear and monitoring program. Data from Knights Landing (KL) Rotary  
 35 Screw Trap (RST), DJFMP Mosssdale Trawl, YBFMP Beach Seine, YBFMP Rotary  
 36 Screw Trap, and EDSM are shown on this figure. The bandwidth for all bean plots was  
 37 set to 5 and the median fork length is highlighted by the solid horizontal black line.  
 38 Catch counts are illustrated by stacked histograms within each density distribution  
 39 polygon.

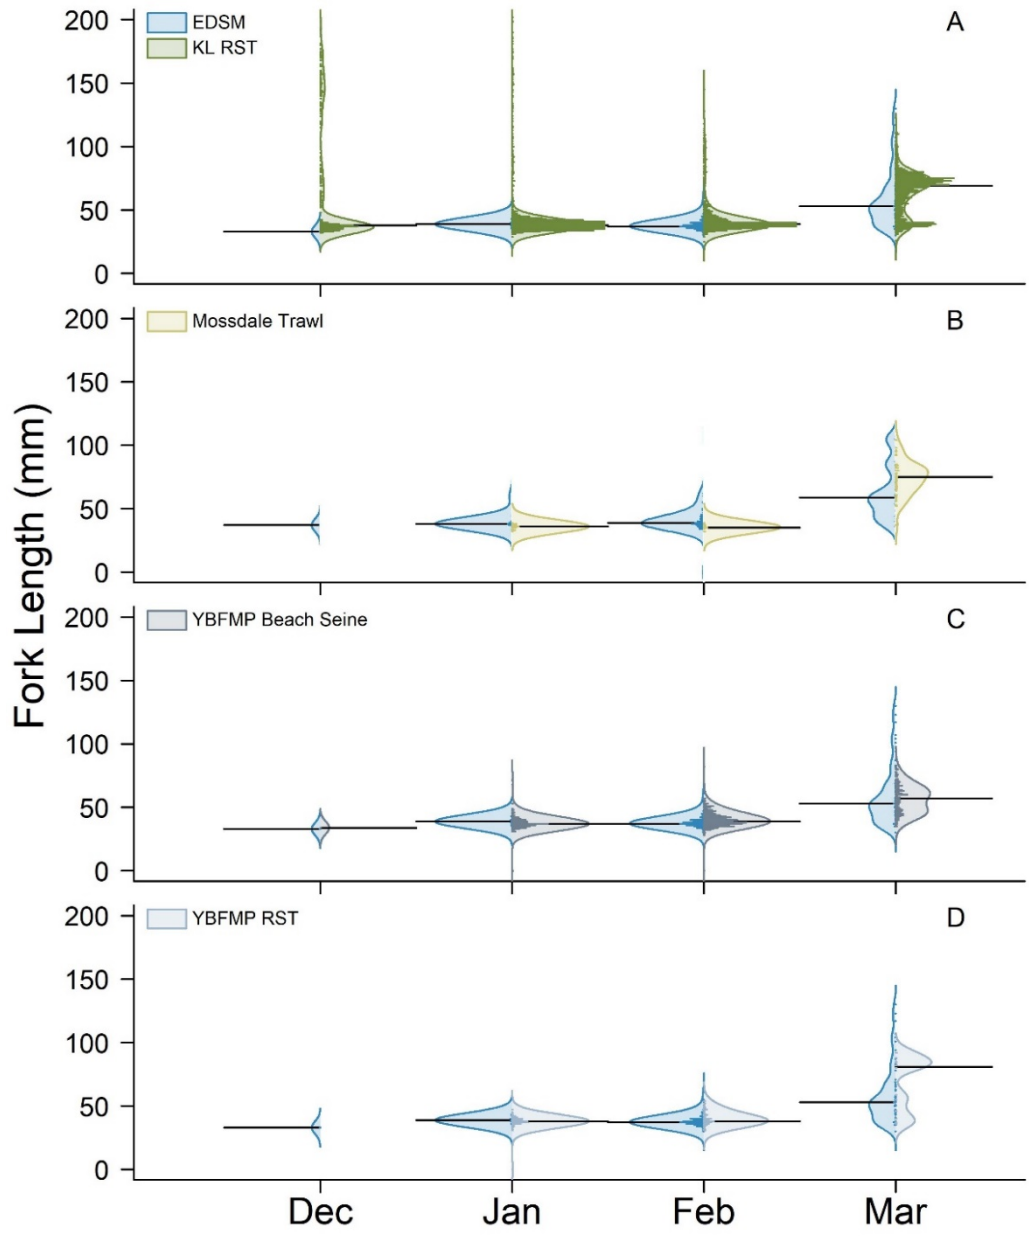

40  
 41  
 42  
 43

44 Figure A3. Model-estimated occupancy probabilities (points) and 95% confidence  
 45 intervals (grey shading) by region for water years (a) 2017 and (b) 2018.

46 (a)  
 47

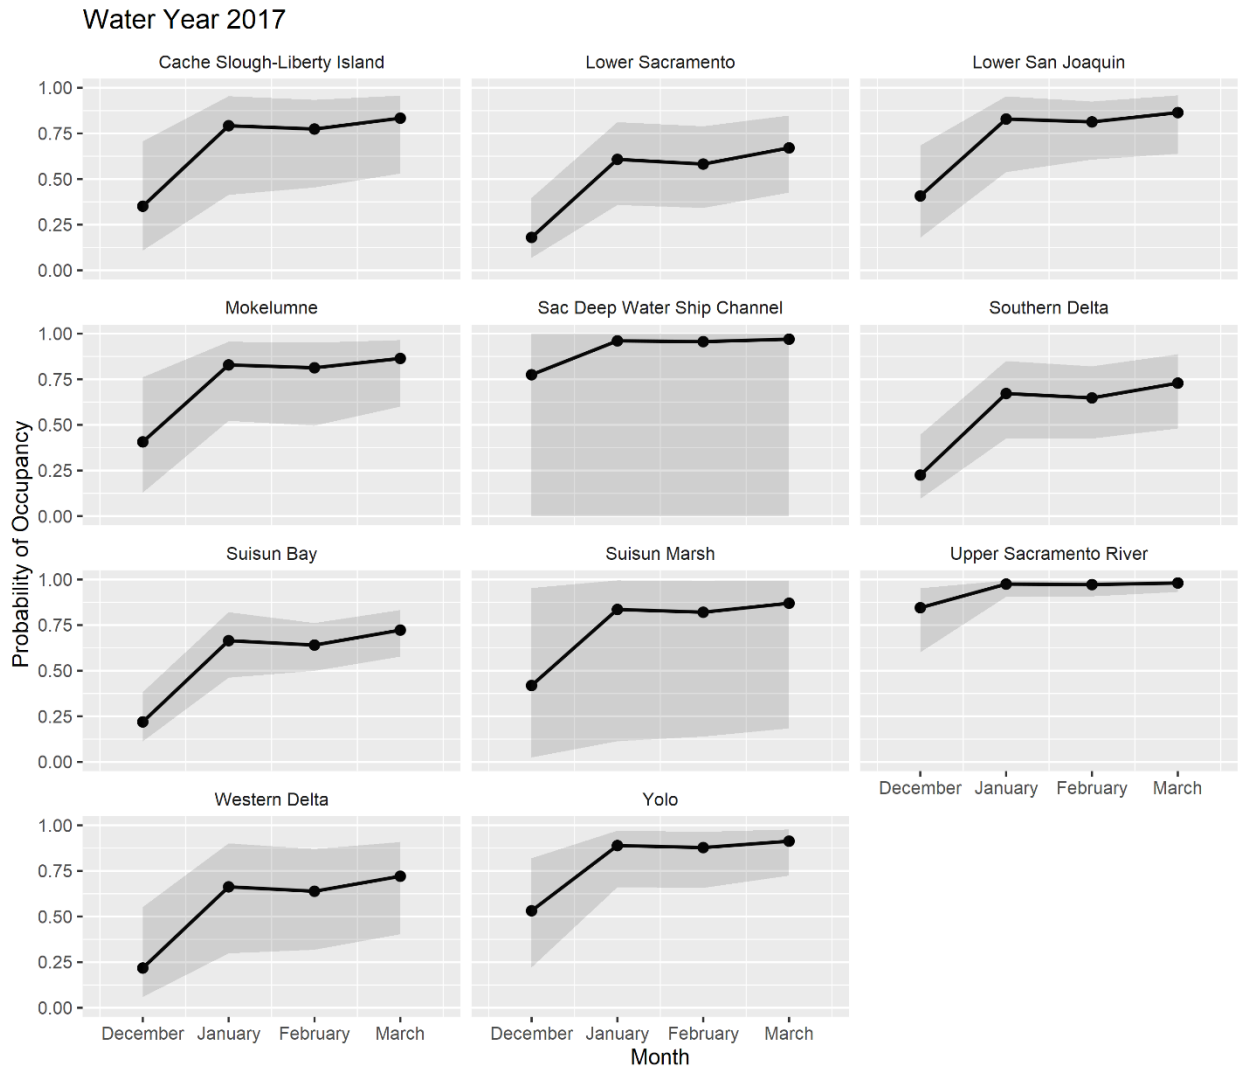

48  
 49  
 50  
 51  
 52  
 53  
 54  
 55  
 56  
 57  
 58  
 59  
 60  
 61

62 (b)

Water Year 2018

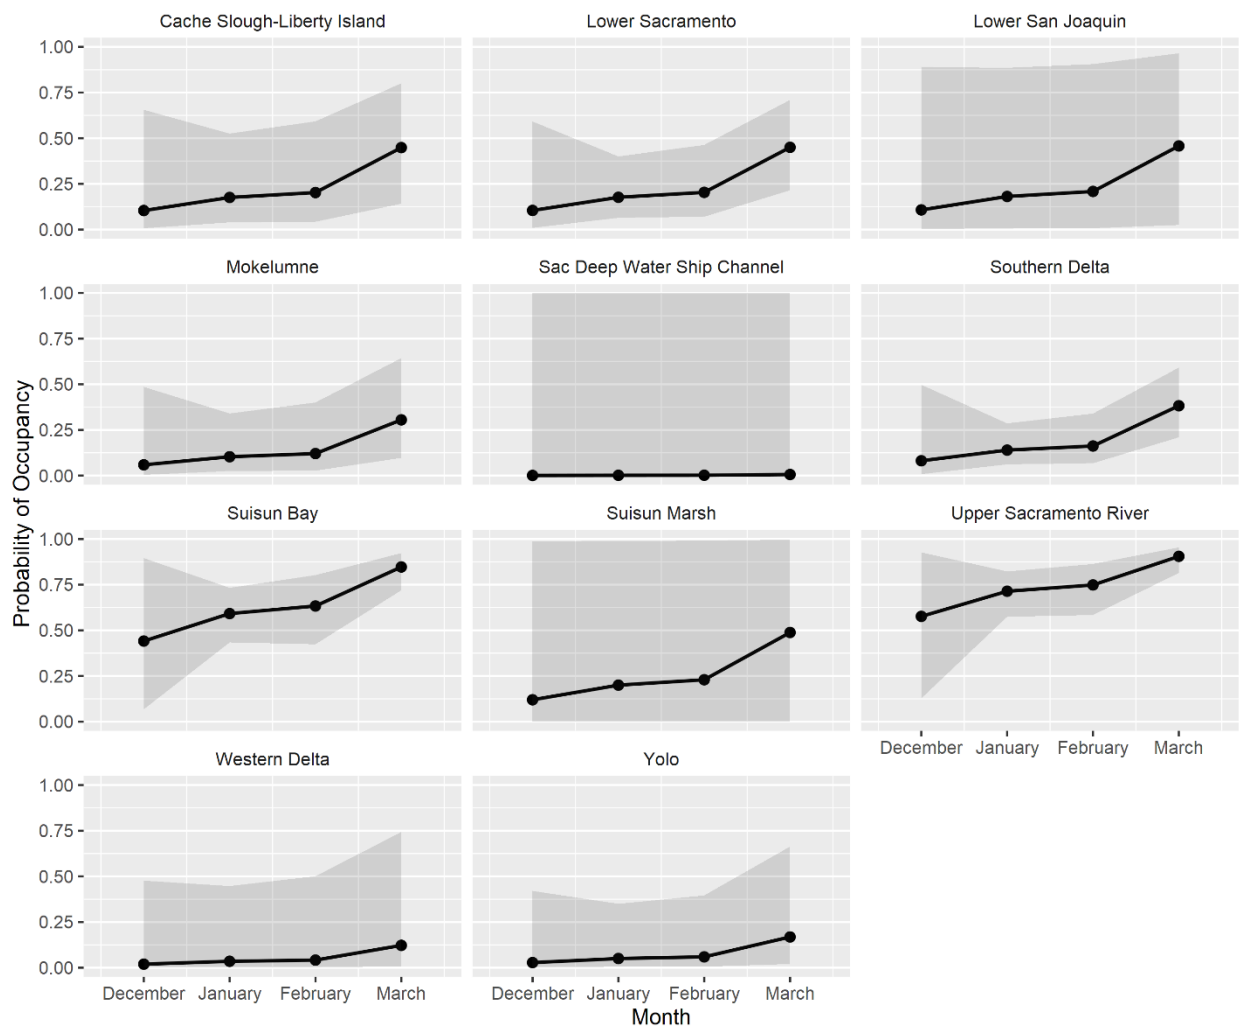

63  
64  
65  
66  
67  
68  
69  
70  
71  
72  
73  
74  
75  
76  
77  
78

79 Figure A4. Model-estimated detection probabilities (points) and 95% confidence  
 80 intervals (color shading) by survey gear type and region for water years (a) 2017 and (b)  
 81 2018.  
 82 (a)

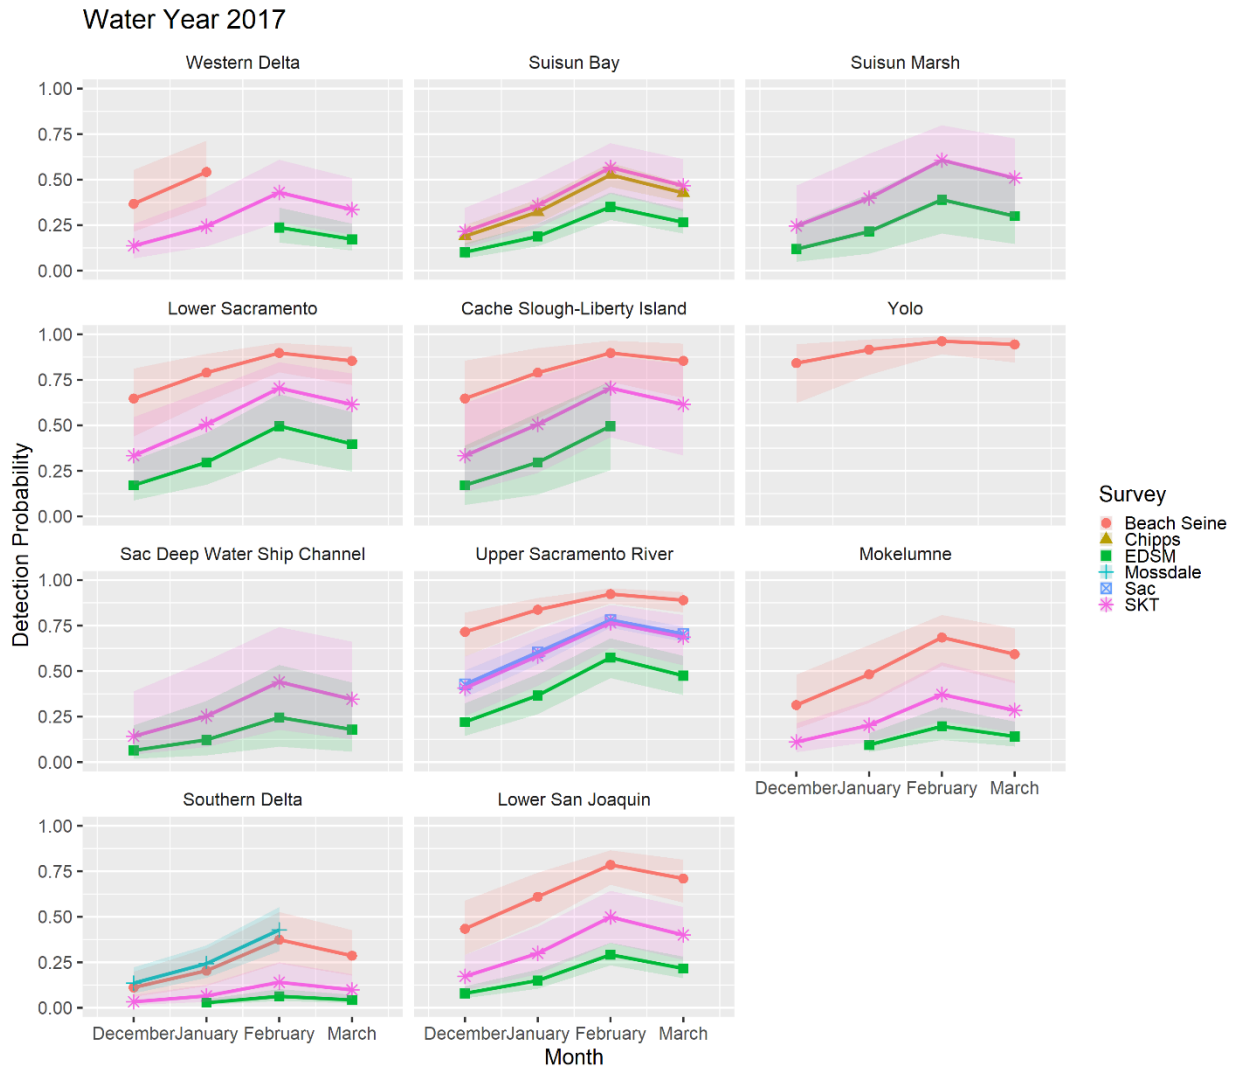

83  
 84  
 85  
 86  
 87  
 88  
 89  
 90  
 91  
 92  
 93  
 94  
 95  
 96

97 (b)

Water Year 2018

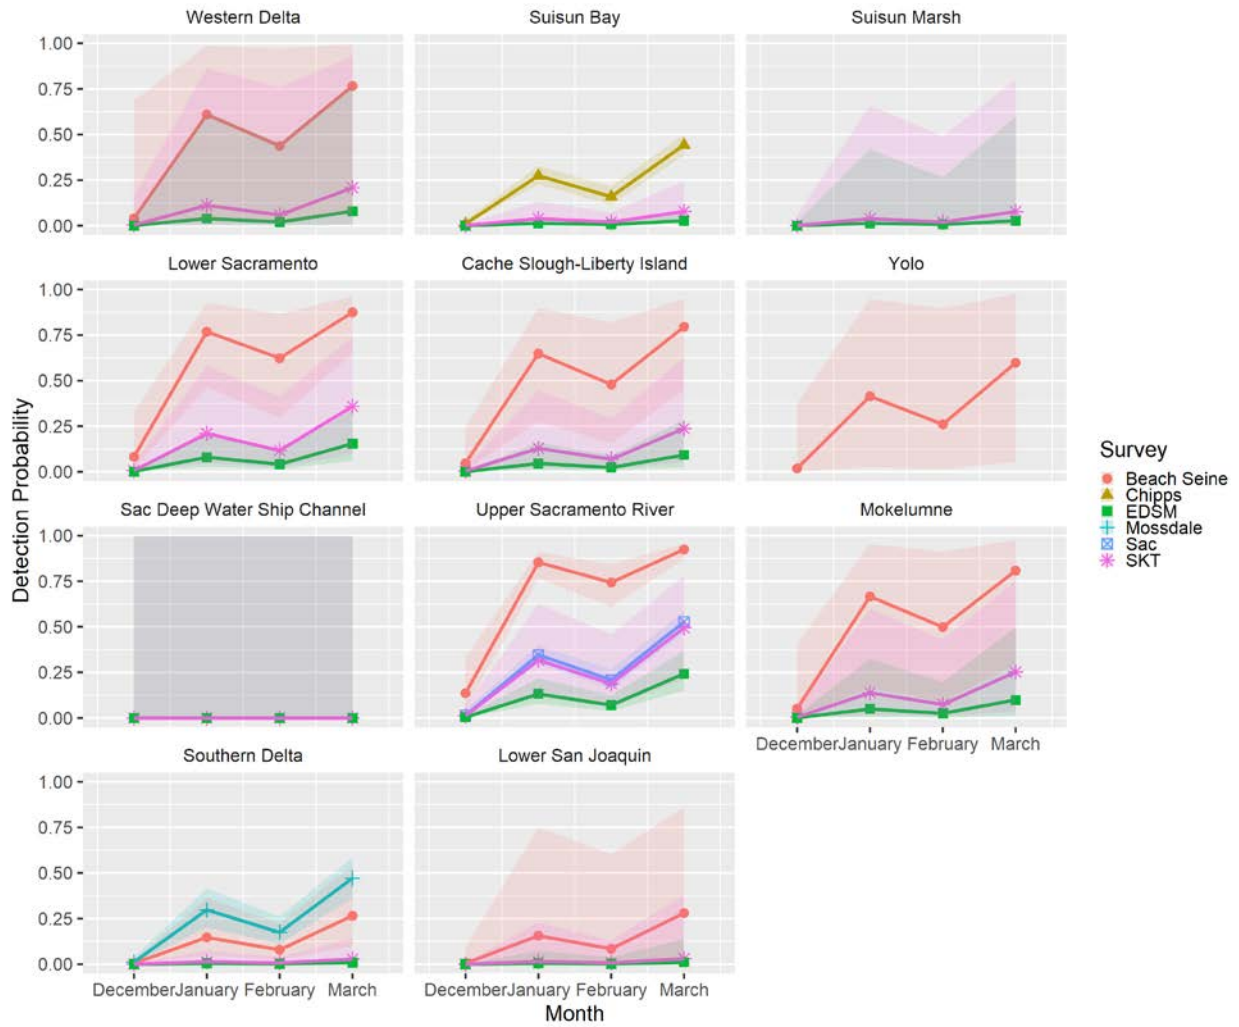

98  
 99  
 100  
 101  
 102  
 103  
 104  
 105  
 106  
 107  
 108  
 109  
 110  
 111  
 112  
 113

114 Figure A5. Across-gear cumulative detection probabilities for juvenile Chinook Salmon  
 115 without EDSM (left column) and with EDSM (middle column), and the change in  
 116 detection probability as a result of including EDSM (right column). Results are organized  
 117 by month and subregion for water years (a) 2017 and (b) 2018.  
 118 (a)

Water Year 2017

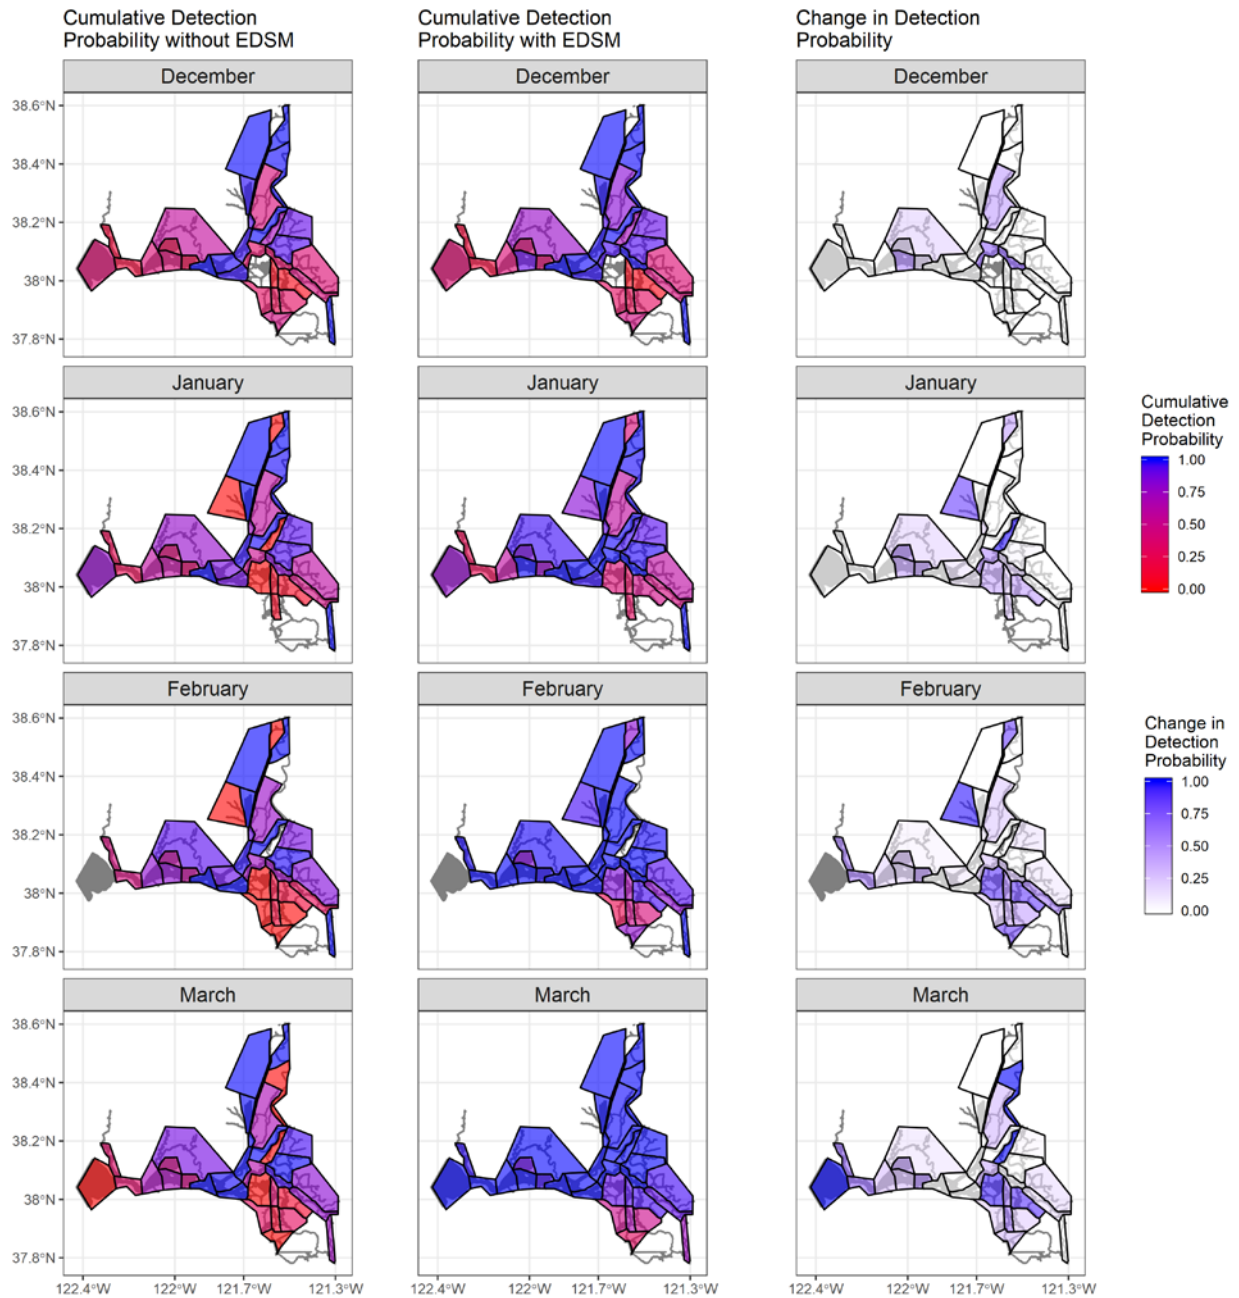

119  
 120  
 121  
 122  
 123  
 124

125  
126  
127

(b)

### Water Year 2018

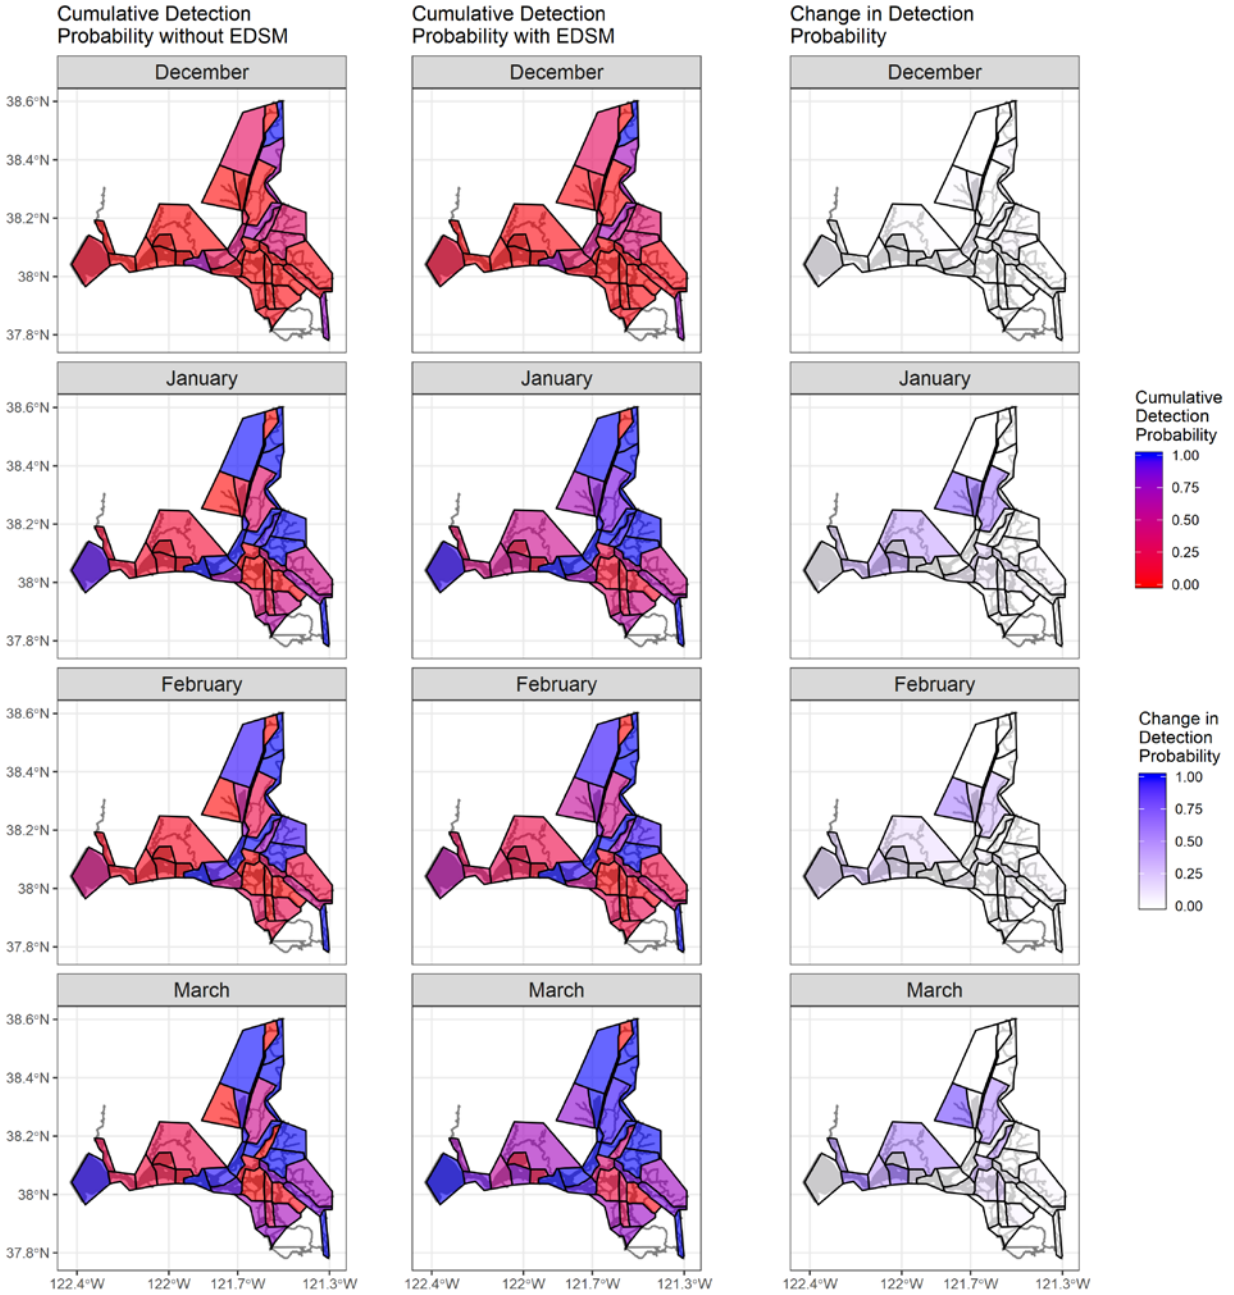

128  
129  
130  
131  
132  
133  
134  
135

136 Table A1. Replicate sample frequencies from the data sets used to fit the water year  
 137 2017 and water year 2018 occupancy models. Frequencies shown (middle and right  
 138 columns) represent the number of sites with a given number of replicate samples (left  
 139 column).  
 140

| Number of Replicate Samples | Frequency (number of sites) |                       |
|-----------------------------|-----------------------------|-----------------------|
|                             | Water Year 2017 Model       | Water Year 2018 Model |
| 1                           | 172                         | 180                   |
| 2                           | 86                          | 105                   |
| 3                           | 19                          | 17                    |
| 4                           | 13                          | 8                     |
| 5                           | 65                          | 120                   |
| 6                           | 16                          | 84                    |
| 7                           | 10                          | 19                    |
| 8                           | 70                          | 12                    |
| 9                           | 10                          | 0                     |
| 10                          | 158                         | 240                   |
| 11                          | 17                          | 19                    |
| 12                          | 12                          | 36                    |
| 13                          | 7                           | 18                    |
| 14                          | 5                           | 15                    |
| 15                          | 8                           | 15                    |
| 16                          | 15                          | 6                     |
| 17                          | 5                           | 2                     |
| 18                          | 3                           | 0                     |
| 19                          | 1                           | 2                     |
| 20                          | 4                           | 3                     |
| 22                          | 0                           | 1                     |
| 24                          | 1                           | 0                     |
| 25                          | 0                           | 1                     |
| 32                          | 1                           | 0                     |

141  
 142  
 143  
 144  
 145  
 146  
 147  
 148  
 149  
 150  
 151  
 152  
 153
